# Supplementary material for: Pathological discrimination between luteinized thecoma associated with sclerosing peritonitis and thecoma
Source: PubMed Central journal article supplement (PMC10256399; doi:10.1097/md.0000000000033911), 2023-06-09

**Supplemental Figure S1.** Molecular pathological markers express no significant difference between LTSP and thecoma. **A-H:** immunohistochemical staining of estrogen receptor (ESR), progesterone receptor (PGR), Vimentin and receptor tyrosine-protein kinase erbB-2 (HER2) show equally intensity in the luteinized cells (**A, C, E, G**) and the thecoma cells (**B, D, F, H**). **I:** Statistical analysis of the four markers. AOD, average optical density; LTSP, luteinized thecoma associated with sclerosing peritonitis. Data are expressed as mean  $\pm$  SD. n = 9–11 sections per marker (**I, LTSP**); n = 80–87 sections per marker (**I, Thecoma**). Scale bar, 500  $\mu$ m.

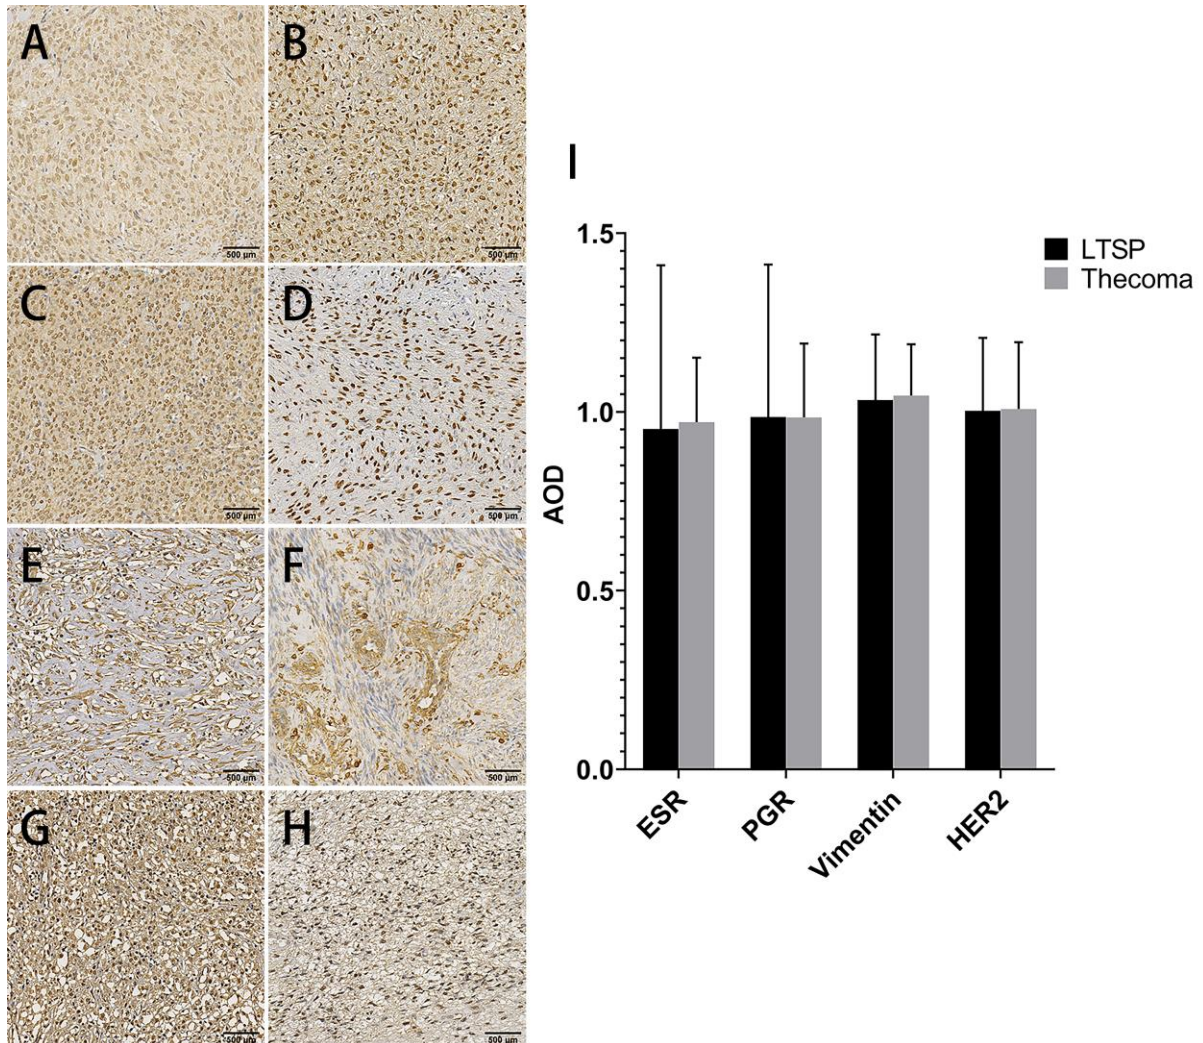

Supplement: medi-102-e33911-s001.pdf [file medi-102-e33911-s001.pdf]
