# Supplementary material for: Pathological discrimination between luteinized thecoma associated with sclerosing peritonitis and thecoma
Source: PubMed Central journal article supplement (PMC10256399; doi:10.1097/md.0000000000033911), 2023-06-09
Supplement: medi-102-e33911-s002.pdf [file medi-102-e33911-s002.pdf]

**Supplemental Figure S2.** The sequences near breakpoints of MGAT5B and NCOA3 gene

fragments are fused together.

```
ACTCAGCCAGCTGGGCCAGGTGGGAGAACATACTGTCTGCATCTGCCCTCCGCCCTCCCGTCCCGTCCCCCTCCCCCTCCCCCTCCCTTCC
ACTCAGCCAGCTGGGCCAGGTGGGAGAACATACTGTCTGCATCTGCCCTCCGCCCTCCCGTCCCGTCCCCCTCCCCCTCCCCCTCCCTTCC
ACTCAGCCAGCTGGGCCAGGTGGGAGAACATACTGTCTGCATCTGCCCTCCGCCCTCCCGTCCCGTCCCCCTCCCCCTCCCCCTCCCTTCC
CTCAGCCAGCTGGGCCAGGTGGGAGAACATACTGTCTGCATCTGCCCTCCGCCCTCCCGTCCCGTCCCCCTCCCCCTCCCCCTCCCTTCC
CTCAGCCAGCTGGGCCAGGTGGGAGAACATACTGTCTGCATCTGCCCTCCGCCCTCCCGTCCCGTCCCCCTCCCCCTCCCCCTCCCTTCC
CTCAGCCAGCTGGGCCAGGTGGGAGAACATACTGTCTGCATCTGCCCTCCGCCCTCCCGTCCCGTCCCCCTCCCCCTCCCCCTCCCTTCC
CAGCCAGCTGGGCCAGGTGGGAGAACATACTGTCTGCATCTGCCCTCCGCCCTCCCGTCCCGTCCCCCTCCCCCTCCCCCTCCCTTCC
CACTCAGCCAGCTGGGCCAGGTGGGAGAACATACTGTCTGCATCTGCCCTCCGCCCTCCCGTCCCGTCCCCCTCCCCCTCCCCCTCCCTTCC
AGCCAGCTGGGCCAGGTGGGAGAACATACTGTCTGCATCTGCCCTCCGCCCTCCCGTCCCGTCCCCCTCCCCCTCCCCCTCCCTTCC
GCCAGCTGGGCCAGGTGGGAGAACATACTGTCTGCATCTGCCCTCCGCCCTCCCGTCCCGTCCCCCTCCCCCTCCCCCTCCCTTCC
CCAGCTGGCTGGTGGTGGGAGAACATACTGTCTGCATCTGCCCTCCGCCCTCCCGTCCCGTCCCCCTCCCCCTCCCCCTCCCTTCC
CAGTGGGGCAGTGGGAGAACATACTGTCTGCATCTGCCCTCCGCCCTCCCGTCCCGTCCCCCTCCCCCTCCCCCTCCCTTCC
CAGCTGGGCCAGGTGGGAGAACATACTGTCTGCATCTGCCCTCCGCCCTCCCGTCCCGTCCCCCTCCCCCTCCCCCTCCCTTCC
CTGGCCCCAGTCCCCACTCAGCCAGCTGGGCCAGGTGGGAGAACATACTGTCTGCATCTGCCCTCCGCCCTCCCGTCCCGTCCCCCT
AGTGGGGCCAGGTGGGAGAACATACTGTCTGCATCTGCCCTCCGCCCTCCCGTCCCGTCCCCCTCCCCCTCCCCCTCCCTTCC
AGCTGGGGCCAGGTGGGAGAACATACTGTCTGCATCTGCCCTCCGCCCTCCCGTCCCGTCCCCCTCCCCCTCCCCCTCCCTTCC
GCTGGGGCCAGGTGGGAGAACATACTGTCTGCATCTGCCCTCCGCCCTCCCGTCCCGTCCCCCTCCCCCTCCCCCTCCCTTCC
GCTGGGGCCAGGTGGGAGAACATACTGTCTGCATCTGCCCTCCGCCCTCCCGTCCCGTCCCCCTCCCCCTCCCCCTCCCTTCC
ACTCAGCCAGCTGGGCCAGGTGGGAGAACATACTGTCTGCATCTGCCCTCCGCCCTCCCGTCCCGTCCCCCTCCCCCTCCCCCTCCCTTCC
GCTGGGGCCAGGTGGGAGAACATACTGTCTGCATCTGCCCTCCGCCCTCCCGTCCCGTCCCCCTCCCCCTCCCCCTCCCTTCC
CTGGGCCAGGTGGGAGAACATACTGTCTGCATCTGCCCTCCGCCCTCCCGTCCCGTCCCCCTCCCCCTCCCCCTCCCTTCC
TGGGCCAGGTGGGAGAACATACTGTCTGCATCTGCCCTCCGCCCTCCCGTCCCGTCCCCCTCCCCCTCCCCCTCCCTTCC
TGGGCCAGGTGGGAGAACATACTGTCTGCATCTGCCCTCCGCCCTCCCGTCCCGTCCCCCTCCCCCTCCCCCTCCCTTCC
GGGCCAGGTGGGAGAACATACTGTCTGCATCTGCCCTCCGCCCTCCCGTCCCGTCCCCCTCCCCCTCCCCCTCCCTTCC
GCCAGGTGGGAGAACATACTGTCTGCATCTGCCCTCCGCCCTCCCGTCCCGTCCCCCTCCCCCTCCCCCTCCCTTCC
CCAGGTGGGAGAACATACTGTCTGCATCTGCCCTCCGCCCTCCCGTCCCGTCCCCCTCCCCCTCCCCCTCCCTTCC
CCAGGTGGGAGAACATACTGTCTGCATCTGCCCTCCGCCCTCCCGTCCCGTCCCCCTCCCCCTCCCCCTCCCTTCC
CAGGTGGGAGAACATACTGTCTGCATCTGCCCTCCGCCCTCCCGTCCCGTCCCCCTCCCCCTCCCCCTCCCTTCC
CAGGTGGGAGAACATACTGTCTGCATCTGCCCTCCGCCCTCCCGTCCCGTCCCCCTCCCCCTCCCCCTCCCTTCC
CAGGTGGGAGAACATACTGTCTGCATCTGCCCTCCGCCCTCCCGTCCCGTCCCCCTCCCCCTCCCCCTCCCTTCC
GGTGGGAGAACATACTGTCTGCATCTGCCCTCCGCCCTCCCGTCCCGTCCCCCTCCCCCTCCCCCTCCCTTCC
GGTGGGAGAACATACTGTCTGCATCTGCCCTCCGCCCTCCCGTCCCGTCCCCCTCCCCCTCCCCCTCCCTTCC
GGTGGGAGAACATACTGTCTGCATCTGCCCTCCGCCCTCCCGTCCCGTCCCCCTCCCCCTCCCCCTCCCTTCC
```
